# Supplementary material
Source: PubMed Central journal article supplement (PMC9330543)
Supplement: NIHMS1692724-supplement-1.pdf [file NIHMS1692724-supplement-1.pdf]

**eTable 1. Cumulative risk of colon cancer by age and gene**

| Age at Cumulative Risk Estimate | Cumulative Risk | Range for Sensitivity Analysis | Reference |
|---------------------------------|-----------------|--------------------------------|-----------|
| MLH1                            |                 |                                | 1,2       |
| 30 years                        | 6.45%           | 5.805%-7.095%                  |           |
| 40 years                        | 19.9%           | 17.91%-21.89%                  |           |
| 50 years                        | 33.45%          | 30.11%-36.80%                  |           |
| 60 years                        | 45.60%          | 50.16%-41.04%                  |           |
| 70 years                        | 56.70%          | 51.03%-62.37%                  |           |
| MSH2                            |                 |                                | 1,2       |
| 30 years                        | 1.21%           | 1.09%-1.33%                    |           |
| 40 years                        | 5.77%           | 5.19%-6.35%                    |           |
| 50 years                        | 16.50%          | 14.85%-18.15%                  |           |
| 60 years                        | 30.05%          | 27.05%-33.06%                  |           |
| 70 years                        | 46.68%          | 42.01%-51.35%                  |           |
| MSH6                            |                 |                                | 1,3       |
| 40 years                        | 1.04%           | 0.93%-1.14%                    |           |
| 50 years                        | 2.67%           | 2.40%-2.94%                    |           |
| 60 years                        | 6.88%           | 6.19%-7.57%                    |           |
| 70 years                        | 15.35%          | 13.82%-16.89%                  |           |
| PMS2                            |                 |                                | 1,4,5     |
| 40 years                        | 0.49%           | 0.44%-0.54%                    |           |
| 50 years                        | 1.37%           | 1.23%-1.50%                    |           |
| 60 years                        | 4.27%           | 3.84%-4.70%                    |           |
| 70 years                        | 8.74%           | 7.87%-9.61%                    |           |

**eTable 2. Cancer stage at diagnosis at varying colonoscopy surveillance intervals**

| <b>Surveillance Interval</b> | <b>Stage I</b> | <b>Stage II</b> | <b>Stage III</b> | <b>Stage IV</b> | <b>Reference</b> |
|------------------------------|----------------|-----------------|------------------|-----------------|------------------|
| No Surveillance              | 40%            | 36%             | 19%              | 5%              | <sup>6</sup>     |
| 1 Year                       | 53%            | 29%             | 17%              | 1%              | <sup>7,8</sup>   |
| 2 Years                      | 53%            | 29%             | 17%              | 1%              | <sup>7,8</sup>   |
| 3 Years                      | 47%            | 42%             | 9%               | 2%              | <sup>7,8</sup>   |
| ≥ 4 Years                    | 47%            | 42%             | 9%               | 2%              | <sup>7,8</sup>   |

**eTable 3. Modeled outcomes under current management guidelines**

| Gene | Strategy                                | QALYs  | Life-Years | CRC Incidence | CRC Death | Cost        |
|------|-----------------------------------------|--------|------------|---------------|-----------|-------------|
| MLH1 | Q1Y, Start age: 25 (Current Guidelines) | 29.506 | 46.477     | 17.04%        | 2.43%     | \$40,783.80 |
| MSH2 | Q1Y, Start age: 25 (Current Guidelines) | 29.699 | 46.734     | 13.27%        | 1.57%     | \$29,298.71 |
| MSH6 | Q1Y, Start age: 25 (Current Guidelines) | 29.835 | 46.916     | 4.38%         | 0.43%     | \$25,999.77 |
| PMS2 | Q1Y, Start age: 25 (Current Guidelines) | 29.853 | 46.938     | 2.05%         | 0.22%     | \$25,094.03 |

QALYs: quality-adjusted life-years, CRC: colorectal cancer

**eTable 4. Modeled outcomes with no intervention**

| <b>Gene</b> | <b>Strategy</b> | <b>QALYs</b> | <b>Life-Years</b> | <b>CRC Incidence</b> | <b>CRC Death</b> | <b>Cost</b>  |
|-------------|-----------------|--------------|-------------------|----------------------|------------------|--------------|
| MLH1        | Natural History | 27.730       | 43.562            | 57.46%               | 15.54%           | \$105,496.21 |
| MSH2        | Natural History | 28.933       | 45.329            | 47.65%               | 10.21%           | \$51,932.14  |
| MSH6        | Natural History | 29.814       | 46.644            | 18.66%               | 3.06%            | \$12,920.36  |
| PMS2        | Natural History | 29.902       | 46.768            | 9.20%                | 1.66%            | \$7,073.75   |

QALYs: quality-adjusted life-years, CRC: colorectal cancer

**eTable 5. Outcomes of All Strategies by gene**

**eTable 5a. MLH1 Model Outcomes**

| Gene | Strategy                                       | QALYs  | Life-Years | CRC Incidence | CRC Death | Cost         | ICER      |
|------|------------------------------------------------|--------|------------|---------------|-----------|--------------|-----------|
| MLH1 | Q5Y, Start age: 40 (Family History Guidelines) | 27.867 | 43.557     | 52.80%        | 13.95%    | \$102,074.89 | Dominated |
| MLH1 | Q5Y, Start age: 35                             | 27.939 | 43.239     | 52.15%        | 13.49%    | \$99,038.00  | Dominated |
| MLH1 | Q5Y, Start age: 30                             | 28.034 | 43.132     | 51.49%        | 12.98%    | \$95,114.62  | Dominated |
| MLH1 | Q4Y, Start age: 40                             | 28.040 | 44.557     | 45.74%        | 12.26%    | \$94,716.12  | Dominated |
| MLH1 | Q5Y, Start age: 25                             | 28.157 | 44.249     | 50.85%        | 12.44%    | \$88,995.03  | Dominated |
| MLH1 | Q4Y, Start age: 35                             | 28.191 | 45.191     | 44.03%        | 11.35%    | \$88,292.80  | Dominated |
| MLH1 | Q1Y, Start age: 40                             | 28.342 | 45.732     | 30.58%        | 8.85%     | \$84,600.56  | Dominated |
| MLH1 | Q3Y, Start age: 40                             | 28.291 | 45.428     | 34.42%        | 9.68%     | \$84,387.14  | Dominated |
| MLH1 | Q2Y, Start age: 40                             | 28.320 | 45.824     | 33.14%        | 9.31%     | \$83,594.89  | Dominated |
| MLH1 | Q4Y, Start age: 30                             | 28.385 | 45.151     | 42.32%        | 10.35%    | \$79,934.64  | Dominated |
| MLH1 | Q1Y, Start age: 35                             | 28.630 | 45.838     | 26.18%        | 6.95%     | \$74,287.70  | Dominated |
| MLH1 | Q3Y, Start age: 35                             | 28.558 | 45.241     | 30.75%        | 8.05%     | \$73,022.45  | Dominated |
| MLH1 | Q2Y, Start age: 35                             | 28.596 | 45.560     | 29.24%        | 7.56%     | \$72,757.00  | Dominated |
| MLH1 | Q4Y, Start age: 25                             | 28.637 | 45.152     | 40.59%        | 9.24%     | \$68,679.24  | Dominated |
| MLH1 | Q1Y, Start age: 30                             | 29.003 | 45.850     | 21.75%        | 4.87%     | \$60,638.67  | Dominated |

| Gene | Strategy                                | QALYs  | Life-Years | CRC Incidence | CRC Death | Cost        | ICER        |
|------|-----------------------------------------|--------|------------|---------------|-----------|-------------|-------------|
| MLH1 | Q3Y, Start age: 30                      | 28.896 | 45.716     | 27.07%        | 6.28%     | \$58,993.77 | Dominated   |
| MLH1 | Q2Y, Start age: 30                      | 28.956 | 46.068     | 25.31%        | 5.64%     | \$57,888.51 | Dominated   |
| MLH1 | Q1Y, Start age: 25 (Current Guidelines) | 29.506 | 46.447     | 17.04%        | 2.48%     | \$40,783.80 | \$44,790.96 |
| MLH1 | Q3Y, Start age: 25                      | 29.347 | 46.138     | 23.19%        | 4.26%     | \$38,982.50 | Dominated   |
| MLH1 | Q2Y, Start age: 25                      | 29.433 | 46.291     | 21.16%        | 3.45%     | \$37514.06  | --          |

QALYs: quality-adjusted life-years, CRC: colorectal cancer

**eTable 5b. MSH2 Model Outcomes**

| Gene | Strategy                                       | QALYs  | Life-Years | CRC Incidence | CRC Death | Cost        | ICER      |
|------|------------------------------------------------|--------|------------|---------------|-----------|-------------|-----------|
| MSH2 | Q5Y, Start age: 40 (Family History Guidelines) | 29.032 | 45.900     | 42.36%        | 8.53%     | \$51,362.57 | Dominated |
| MSH2 | Q5Y, Start age: 35                             | 29.052 | 45.779     | 42.11%        | 8.35%     | \$50,569.52 | Dominated |
| MSH2 | Q5Y, Start age: 30                             | 29.078 | 45.539     | 41.79%        | 8.27%     | \$49,769.34 | Dominated |

| Gene | Strategy           | QALYs  | Life-Years | CRC Incidence | CRC Death | Cost        | ICER           |
|------|--------------------|--------|------------|---------------|-----------|-------------|----------------|
| MSH2 | Q5Y, Start age: 25 | 29.093 | 45.687     | 41.63%        | 8.05%     | \$48,531.17 | Dominated      |
| MSH2 | Q4Y, Start age: 40 | 29.192 | 45.853     | 34.30%        | 6.79%     | \$44,485.53 | Dominated      |
| MSH2 | Q4Y, Start age: 35 | 29.248 | 45.842     | 33.58%        | 6.41%     | \$42,151.82 | Dominated      |
| MSH2 | Q4Y, Start age: 30 | 29.292 | 46.138     | 33.58%        | 6.41%     | \$40,520.20 | Dominated      |
| MSH2 | Q4Y, Start age: 25 | 29.329 | 46.050     | 32.67%        | 5.91%     | \$38,928.68 | Dominated      |
| MSH2 | Q1Y, Start age: 40 | 29.467 | 46.192     | 17.12%        | 3.34%     | \$35,386.00 | Dominated      |
| MSH2 | Q3Y, Start age: 40 | 29.423 | 46.311     | 21.46%        | 4.16%     | \$35,000.25 | Dominated      |
| MSH2 | Q2Y, Start age: 40 | 29.448 | 46.237     | 20.01%        | 3.80%     | \$34,265.87 | Dominated      |
| MSH2 | Q1Y, Start age: 30 | 29.627 | 46.442     | 14.22%        | 2.08%     | \$33,265.61 | Dominated      |
| MSH2 | Q1Y, Start age: 35 | 29.571 | 46.315     | 15.23%        | 2.53%     | \$33,103.20 | Dominated      |
| MSH2 | Q1Y, Start age: 25 | 29.699 | 46.734     | 13.27%        | 1.61%     | \$32,261.21 | \$2,009,850.42 |
| MSH2 | Q2Y, Start age: 35 | 29.554 | 46.462     | 18.34%        | 3.06%     | \$30,841.79 | Dominated      |
| MSH2 | Q3Y, Start age: 35 | 29.530 | 46.186     | 19.89%        | 3.46%     | \$30,477.17 | Dominated      |
| MSH2 | Q2Y, Start age: 30 | 29.620 | 46.547     | 17.42%        | 2.63%     | \$28,819.34 | Dominated      |
| MSH2 | Q3Y, Start age: 30 | 29.593 | 46.443     | 19.01%        | 3.06%     | \$28,570.21 | Dominated      |
| MSH2 | Q2Y, Start age: 25 | 29.696 | 46.643     | 16.57%        | 2.20%     | \$26,231.66 | \$29,298.71    |
| MSH2 | Q3Y, Start age: 25 | 29.668 | 46.568     | 18.21%        | 2.66%     | \$25,323.40 | --             |

QALYs: quality-adjusted life-years, CRC: colorectal cancer

**eTable 5c. MSH6 Model Outcomes**

| Gene | Strategy           | QALYs  | Life-Years | CRC Incidence | CRC Death | Cost        | ICER         |
|------|--------------------|--------|------------|---------------|-----------|-------------|--------------|
| MSH6 | Q1Y, Start age: 25 | 29.835 | 46.916     | 4.38%         | 0.44%     | \$25,999.77 | Dominated    |
| MSH6 | Q1Y, Start age: 30 | 29.843 | 46.871     | 4.64%         | 0.56%     | \$23,532.68 | Dominated    |
| MSH6 | Q1Y, Start age: 35 | 29.852 | 46.899     | 4.90%         | 0.68%     | \$20,505.33 | Dominated    |
| MSH6 | Q5Y, Start age: 30 | 29.778 | 46.675     | 15.79%        | 2.38%     | \$19,017.17 | Dominated    |
| MSH6 | Q5Y, Start age: 25 | 29.771 | 46.678     | 15.74%        | 2.35%     | \$18,812.71 | Dominated    |
| MSH6 | Q5Y, Start age: 35 | 29.784 | 46.690     | 15.85%        | 2.41%     | \$18,343.68 | Dominated    |
| MSH6 | Q5Y, Start age: 40 | 29.785 | 46.684     | 15.95%        | 2.46%     | \$18,164.77 | Dominated    |
| MSH6 | Q1Y, Start age: 40 | 29.863 | 46.869     | 5.17%         | 0.78%     | \$17,869.17 | Dominated    |
| MSH6 | Q2Y, Start age: 25 | 29.886 | 46.896     | 5.54%         | 0.60%     | \$17,443.38 | Dominated    |
| MSH6 | Q4Y, Start age: 25 | 29.825 | 46.764     | 11.77%        | 1.67%     | \$16,997.13 | Dominated    |
| MSH6 | Q2Y, Start age: 30 | 29.884 | 46.877     | 5.78%         | 0.71%     | \$16,686.72 | Dominated    |
| MSH6 | Q4Y, Start age: 30 | 29.829 | 46.746     | 11.90%        | 1.73%     | \$16,655.23 | Dominated    |
| MSH6 | Q4Y, Start age: 35 | 29.830 | 46.730     | 12.02%        | 1.79%     | \$16,309.91 | Dominated    |
| MSH6 | Q4Y, Start age: 40 | 29.827 | 46.772     | 12.18%        | 1.86%     | \$16,296.75 | Dominated    |
| MSH6 | Q2Y, Start age: 35 | 29.881 | 46.818     | 6.02%         | 0.82%     | \$15,926.33 | Dominated    |
| MSH6 | Q3Y, Start age: 30 | 29.892 | 46.840     | 6.36%         | 0.82%     | \$14,871.72 | Dominated    |
| MSH6 | Q3Y, Start age: 25 | 29.895 | 46.842     | 6.13%         | 0.72%     | \$14,813.35 | \$246,980.73 |



| Gene | Strategy           | QALYs  | Life-Years | CRC Incidence | CRC Death | Cost        | ICER      |
|------|--------------------|--------|------------|---------------|-----------|-------------|-----------|
| MSH6 | Q2Y, Start age: 40 | 29.882 | 46.810     | 6.27%         | 0.92%     | \$14,736.66 | Dominated |
| MSH6 | Q3Y, Start age: 40 | 29.885 | 46.823     | 6.83%         | 1.02%     | \$14,272.85 | Dominated |
| MSH6 | Q3Y, Start age: 35 | 29.892 | 46.837     | 6.56%         | 0.92%     | \$14,072.41 | --        |

QALYs: quality-adjusted life-years, CRC: colorectal cancer

Journal Pre-proof

**eTable 5d. PMS2 Model Outcomes**

| Gene | Strategy           | QALYs  | Life-Years | CRC Incidence | CRC Death | Cost        | ICER      |
|------|--------------------|--------|------------|---------------|-----------|-------------|-----------|
| PMS2 | Q1Y, Start age: 25 | 29.853 | 46.938     | 2.05%         | 0.23%     | \$25,094.03 | Dominated |
| PMS2 | Q1Y, Start age: 30 | 29.875 | 46.931     | 2.18%         | 0.29%     | \$22,016.02 | Dominated |
| PMS2 | Q1Y, Start age: 35 | 29.894 | 46.934     | 2.33%         | 0.35%     | \$18,555.61 | Dominated |
| PMS2 | Q2Y, Start age: 25 | 29.910 | 46.927     | 2.61%         | 0.31%     | \$16,213.19 | Dominated |
| PMS2 | Q1Y, Start age: 40 | 29.915 | 46.906     | 2.45%         | 0.39%     | \$15,488.07 | Dominated |
| PMS2 | Q2Y, Start age: 30 | 29.922 | 46.925     | 2.73%         | 0.37%     | \$14,875.89 | Dominated |
| PMS2 | Q5Y, Start age: 30 | 29.873 | 46.829     | 7.71%         | 1.29%     | \$14,495.62 | Dominated |
| PMS2 | Q5Y, Start age: 25 | 29.863 | 46.804     | 7.68%         | 1.27%     | \$14,449.22 | Dominated |
| PMS2 | Q4Y, Start age: 25 | 29.890 | 46.853     | 5.66%         | 0.89%     | \$13,856.57 | Dominated |
| PMS2 | Q2Y, Start age: 35 | 29.927 | 46.924     | 2.86%         | 0.43%     | \$13,704.22 | Dominated |
| PMS2 | Q5Y, Start age: 35 | 29.883 | 46.806     | 7.73%         | 1.30%     | \$13,657.54 | Dominated |
| PMS2 | Q3Y, Start age: 25 | 29.926 | 46.919     | 2.86%         | 0.38%     | \$13,359.57 | Dominated |
| PMS2 | Q5Y, Start age: 40 | 29.887 | 46.817     | 7.80%         | 1.32%     | \$13,349.79 | Dominated |
| PMS2 | Q4Y, Start age: 30 | 29.902 | 46.852     | 5.73%         | 0.92%     | \$13,186.89 | Dominated |
| PMS2 | Q3Y, Start age: 30 | 29.933 | 46.919     | 3.01%         | 0.43%     | \$12,866.76 | Dominated |
| PMS2 | Q4Y, Start age: 35 | 29.909 | 46.849     | 5.79%         | 0.95%     | \$12,578.88 | Dominated |
| PMS2 | Q4Y, Start age: 40 | 29.912 | 46.858     | 5.88%         | 0.99%     | \$12,328.57 | Dominated |

| Gene | Strategy           | QALYs  | Life-Years | CRC Incidence | CRC Death | Cost        | ICER      |
|------|--------------------|--------|------------|---------------|-----------|-------------|-----------|
| PMS2 | Q2Y, Start age: 40 | 29.938 | 46.891     | 2.98%         | 0.47%     | \$12,108.99 | Dominated |
| PMS2 | Q3Y, Start age: 35 | 29.940 | 46.908     | 3.13%         | 0.48%     | \$11,672.08 | Dominated |
| PMS2 | Q3Y, Start age: 40 | 29.941 | 46.890     | 3.25%         | 0.52%     | \$11,491.14 | --        |

QALYs: quality-adjusted life-years, CRC: colorectal cancer

Journal Pre-proof

**eTable 6. One-way Sensitivity Analysis (OWSA) Results by Gene**

**eTable 6a. MLH1 One-Way Sensitivity Analysis (OWSA) Results**

| Costs                        |              |             |                       |             |                      |             |
|------------------------------|--------------|-------------|-----------------------|-------------|----------------------|-------------|
| Parameter                    | High Value   | Low Value   | High Optimal Strategy | High ICER   | Low Optimal Strategy | Low ICER    |
| Colonoscopy without biopsy   | \$1,174.97   | \$783.31    | Q1Y, Start age: 25    | \$70,504.08 | Q1Y, Start age: 25   | \$19,077.83 |
| Colonoscopy with biopsy      | \$1,443.60   | \$962.40    | Q1Y, Start age: 25    | \$44,814.32 | Q1Y, Start age: 25   | \$44,767.59 |
| Colectomy                    | \$36,807.60  | \$24,538.40 | Q1Y, Start age: 25    | \$44,988.61 | Q1Y, Start age: 25   | \$44,988.61 |
| Stage I CRC continued care   | \$4,017.54   | \$2,678.36  | Q1Y, Start age: 25    | \$43,598.08 | Q1Y, Start age: 25   | \$45,983.83 |
| Stage II CRC continued care  | \$3,780.44   | \$2,520.30  | Q1Y, Start age: 25    | \$43,559.03 | Q1Y, Start age: 25   | \$46,022.88 |
| Stage III CRC continued care | \$5,296.57   | \$3,531.05  | Q1Y, Start age: 25    | \$44,473.44 | Q1Y, Start age: 25   | \$45,108.47 |
| Stage IV CRC continued care  | \$16,041.20  | \$10,694.14 | Q1Y, Start age: 25    | \$44,789.06 | Q1Y, Start age: 25   | \$44,792.86 |
| Stage I CRC initial care     | \$54,491.17  | \$36,327.45 | Q1Y, Start age: 25    | \$43,849.38 | Q1Y, Start age: 25   | \$45,732.53 |
| Stage II CRC initial care    | \$73,135.19  | \$48,756.79 | Q1Y, Start age: 25    | \$43,102.21 | Q1Y, Start age: 25   | \$46,479.7  |
| Stage III CRC initial care   | \$88,769.66  | \$59,179.78 | Q1Y, Start age: 25    | \$44,148.92 | Q1Y, Start age: 25   | \$45,432.99 |
| Stage IV CRC initial care    | \$115,554.01 | \$77,036.01 | Q1Y, Start age: 25    | \$44,624.74 | Q1Y, Start age: 25   | \$44,957.17 |
| Colonoscopy complications    | \$4,777.42   | \$3,184.94  | Q1Y, Start age: 25    | \$45,006.18 | Q1Y, Start age: 25   | \$44,745.73 |
| Parameter                    | High Value   | Low Value   | High Optimal          | High ICER   | Low Optimal          | Low ICER    |

|                                  |              |             | Strategy           |             | Strategy           |             |
|----------------------------------|--------------|-------------|--------------------|-------------|--------------------|-------------|
| Stage I CRC end-of-life care     | \$84,050.93  | \$44,666.80 | Q1Y, Start age: 25 | \$44,212.74 | Q1Y, Start age: 25 | \$45,369.17 |
| Stage II CRC end-of-life care    | \$83,716.93  | \$44,488.50 | Q1Y, Start age: 25 | \$40,678.13 | Q1Y, Start age: 25 | \$48,903.78 |
| Stage III CRC end-of-life care   | \$83,307.61  | \$46,928.72 | Q1Y, Start age: 25 | \$40,440.49 | Q1Y, Start age: 25 | \$49,141.43 |
| Stage IV CRC end-of-life care    | \$116,399.88 | \$61,857.64 | Q1Y, Start age: 25 | \$42,840.14 | Q1Y, Start age: 25 | \$46,741.78 |
| <b>Quality of Life Utilities</b> |              |             |                    |             |                    |             |
| Stage I CRC initial care         | 0.9152       | 0.8448      | Q1Y, Start age: 25 | \$45,520.8  | Q1Y, Start age: 25 | \$44,042.48 |
| Stage II CRC initial care        | 0.8528       | 0.7872      | Q1Y, Start age: 25 | \$45,992.02 | Q1Y, Start age: 25 | \$43,575.53 |
| Stage III CRC initial care       | 0.7904       | 0.7296      | Q1Y, Start age: 25 | \$45,084.96 | Q1Y, Start age: 25 | \$44,394.92 |
| Stage IV CRC initial care        | 0.312        | 0.288       | Q1Y, Start age: 25 | \$44,793.82 | Q1Y, Start age: 25 | \$44,780.03 |
| Stage I CRC continued care       | 0.988        | 0.912       | Q1Y, Start age: 25 | \$51,899.8  | Q1Y, Start age: 25 | \$38,200.89 |
| Stage II CRC continued care      | 0.988        | 0.912       | Q1Y, Start age: 25 | \$53,946.3  | Q1Y, Start age: 25 | \$36,840.04 |
| Stage III CRC continued care     | 0.7904       | 0.7296      | Q1Y, Start age: 25 | \$46,509.29 | Q1Y, Start age: 25 | \$43,192.19 |
| Stage IV CRC continued care      | 0.312        | 0.288       | Q1Y, Start age: 25 | \$44,794.96 | Q1Y, Start age: 25 | \$44,780.96 |
| Stage I CRC end-of-life care     | 0.312        | 0.288       | Q1Y, Start age: 25 | \$45,120.8  | Q1Y, Start age: 25 | \$44,442.48 |

|                                        |                   |                  |                              |                  |                             |                 |
|----------------------------------------|-------------------|------------------|------------------------------|------------------|-----------------------------|-----------------|
| Stage II CRC end-of-life care          | 0.312             | 0.288            | Q1Y, Start age: 25           | \$45,202.02      | Q1Y, Start age: 25          | \$44,375.53     |
| Stage III CRC end-of-life care         | 0.312             | 0.288            | Q1Y, Start age: 25           | \$44,884.96      | Q1Y, Start age: 25          | \$44,574.92     |
| Stage IV CRC end-of-life care          | 0.312             | 0.288            | Q1Y, Start age: 25           | \$44,793.82      | Q1Y, Start age: 25          | \$44,780.03     |
| Colonoscopy (disutility)               | 0.00572           | 0.00528          | Q1Y, Start age: 25           | \$47,676.68      | Q1Y, Start age: 25          | \$42,309.65     |
| Colonoscopy complications (disutility) | 0.039936          | 0.036864         | Q1Y, Start age: 25           | \$44,792.38      | Q1Y, Start age: 25          | \$44,786.86     |
| <b>Probabilities</b>                   |                   |                  |                              |                  |                             |                 |
| <b>Parameter</b>                       | <b>High Value</b> | <b>Low Value</b> | <b>High Optimal Strategy</b> | <b>High ICER</b> | <b>Low Optimal Strategy</b> | <b>Low ICER</b> |
| Lifetime CRC risk <sup>a</sup>         |                   |                  | Q1Y, Start age: 25           | \$27,302.15      | Q1Y, Start age: 25          | \$70,110.89     |
| Adenoma Risk <sup>b</sup>              |                   |                  | Q1Y, Start age: 25           | \$39,978.66      | Q1Y, Start age: 25          | \$47,095.8      |
| Advanced Adenoma Risk <sup>b</sup>     |                   |                  | Q1Y, Start age: 25           | \$42,073.32      | Q1Y, Start age: 25          | \$45,646.24     |
| Q1Y colonoscopy interval CRC rate      | 0.22575           | 0.20425          | Q1Y, Start age: 25           | \$84,066.92      | Q1Y, Start age: 25          | \$26,353.94     |
| Q2 colonoscopy interval CRC rate       | 0.2877            | 0.2603           | Q1Y, Start age: 25           | \$22,279.12      | Q2Y, Start age: 25          | \$107,673.35    |
| Q3Y colonoscopy interval CRC rate      | 0.3192            | 0.2888           | Q1Y, Start age: 25           | \$44,790.96      | Q1Y, Start age: 25          | \$44,790.96     |
| Q4Y colonoscopy interval CRC rate      | 0.63              | 0.57             | Q1Y, Start age: 25           | \$44,790.96      | Q1Y, Start age: 25          | \$44,790.96     |
| Q5Y colonoscopy                        | 0.87045           | 0.78755          | Q1Y, Start                   | \$44,790.96      | Q1Y, Start                  | \$44,790.96     |

|                                |          |          |                    |             |                    |             |
|--------------------------------|----------|----------|--------------------|-------------|--------------------|-------------|
| interval CRC rate              |          |          | age: 25            |             | age: 25            |             |
| Colectomy death <60            | 0.000315 | 0.000285 | Q1Y, Start age: 25 | \$44,342.76 | Q1Y, Start age: 25 | \$45,244.77 |
| Colectomy death 60-70          | 0.00084  | 0.00076  | Q1Y, Start age: 25 | \$44,640.73 | Q1Y, Start age: 25 | \$44,941.81 |
| Colectomy death 70-80          | 0.00063  | 0.00057  | Q1Y, Start age: 25 | \$44,779.55 | Q1Y, Start age: 25 | \$44,802.37 |
| Stage 1 CRC death <sup>d</sup> |          |          |                    |             |                    |             |
| Stage 2 CRC death              | 0.01995  | 0.01805  | Q1Y, Start age: 25 | \$43,374.92 | Q1Y, Start age: 25 | \$46,282.62 |
| Stage 3 CRC death              | 0.07245  | 0.06555  | Q1Y, Start age: 25 | \$44,014.07 | Q1Y, Start age: 25 | \$45,620.74 |
| Stage 4 CRC death              | 0.96705  | 0.87495  | Q1Y, Start age: 25 | \$44,782.34 | Q1Y, Start age: 25 | \$44,800.45 |
| Colonoscopy complications      | 0.000088 | 0.000072 | Q1Y, Start age: 25 | \$44,790.96 | Q1Y, Start age: 25 | \$44,790.96 |

ICER: incremental cost-effectiveness ratio, CRC: colorectal cancer.

<sup>a</sup>Lifetime CRC risk OWSA values can be found in eTable1

<sup>b</sup>Adenoma and advanced adenoma risk OWSA values can be found in References 9,10

<sup>c</sup>Stage 1 CRC death OWSA is represented in the colectomy death rows because Stage 1 CRC death was assumed to be from only colectomy death

**eTable 6b. MSH2 One-Way Sensitivity Analysis (OWSA) Results**

| Costs                      |             |             |                       |             |                      |             |
|----------------------------|-------------|-------------|-----------------------|-------------|----------------------|-------------|
| Parameter                  | High Value  | Low Value   | High Optimal Strategy | High ICER   | Low Optimal Strategy | Low ICER    |
| Colonoscopy without biopsy | \$1,174.97  | \$783.31    | Q2Y, Start age: 25    | \$50,222.59 | Q2Y, Start age: 25   | \$8,374.83  |
| Colonoscopy with biopsy    | \$1,443.60  | \$962.40    | Q2Y, Start age: 25    | \$29,313.9  | Q2Y, Start age: 25   | \$29,283.52 |
| Colectomy                  | \$36,807.60 | \$24,538.40 | Q2Y, Start age: 25    | \$29,298.71 | Q2Y, Start age: 25   | \$29,298.71 |
| Stage I CRC continued care | \$4,017.54  | \$2,678.36  | Q2Y, Start age: 25    | \$29,838.45 | Q2Y, Start age: 25   | \$28,758.98 |

|                                  |                   |                  |                              |                  |                             |                 |
|----------------------------------|-------------------|------------------|------------------------------|------------------|-----------------------------|-----------------|
| Stage II CRC continued care      | \$3,780.44        | \$2,520.30       | Q2Y, Start age: 25           | \$27,527.91      | Q2Y, Start age: 25          | \$31,069.52     |
| Stage III CRC continued care     | \$5,296.57        | \$3,531.05       | Q2Y, Start age: 25           | \$28,994.93      | Q2Y, Start age: 25          | \$29,602.5      |
| Stage IV CRC continued care      | \$16,041.20       | \$10,694.14      | Q2Y, Start age: 25           | \$29,295.14      | Q2Y, Start age: 25          | \$29,302.28     |
| Stage I CRC initial care         | \$54,491.17       | \$36,327.45      | Q2Y, Start age: 25           | \$29,921.85      | Q2Y, Start age: 25          | \$28,675.57     |
| Stage II CRC initial care        | \$73,135.19       | \$48,756.79      | Q2Y, Start age: 25           | \$26,324.6       | Q2Y, Start age: 25          | \$32,272.82     |
| Stage III CRC initial care       | \$88,769.66       | \$59,179.78      | Q2Y, Start age: 25           | \$28,604.13      | Q2Y, Start age: 25          | \$29,993.3      |
| Stage IV CRC initial care        | \$115,554.01      | \$77,036.01      | Q2Y, Start age: 25           | \$28,983.25      | Q2Y, Start age: 25          | \$29,614.17     |
| Colonoscopy complications        | \$4,777.42        | \$3,184.94       | Q2Y, Start age: 25           | \$29,384.23      | Q2Y, Start age: 25          | \$29,213.2      |
| Stage I CRC end-of-life care     | \$84,050.93       | \$44,666.80      | Q2Y, Start age: 25           | \$29,622.02      | Q2Y, Start age: 25          | \$28,975.4      |
| Stage II CRC end-of-life care    | \$83,716.93       | \$44,488.50      | Q2Y, Start age: 25           | \$25,023.33      | Q2Y, Start age: 25          | \$33,574.1      |
| Stage III CRC end-of-life care   | \$83,307.61       | \$46,928.72      | Q2Y, Start age: 25           | \$25,909.92      | Q2Y, Start age: 25          | \$32,687.51     |
| Stage IV CRC end-of-life care    | \$116,399.88      | \$61,857.64      | Q2Y, Start age: 25           | \$26,419.2       | Q2Y, Start age: 25          | \$32,178.22     |
| <b>Quality of Life Utilities</b> |                   |                  |                              |                  |                             |                 |
| <b>Parameter</b>                 | <b>High Value</b> | <b>Low Value</b> | <b>High Optimal Strategy</b> | <b>High ICER</b> | <b>Low Optimal Strategy</b> | <b>Low ICER</b> |
| Stage I CRC initial care         | 0.9152            | 0.8448           | Q2Y, Start age: 25           | \$29,068.65      | Q2Y, Start age: 25          | \$29,530.87     |



|                                        |          |          |                    |             |                    |             |
|----------------------------------------|----------|----------|--------------------|-------------|--------------------|-------------|
| Stage II CRC initial care              | 0.8528   | 0.7872   | Q2Y, Start age: 25 | \$30,077.56 | Q2Y, Start age: 25 | \$28,537.17 |
| Stage III CRC initial care             | 0.7904   | 0.7296   | Q2Y, Start age: 25 | \$29,433.96 | Q2Y, Start age: 25 | \$29,164.57 |
| Stage IV CRC initial care              | 0.312    | 0.288    | Q2Y, Start age: 25 | \$29,317.6  | Q2Y, Start age: 25 | \$29,280.43 |
| Stage I CRC continued care             | 0.988    | 0.912    | Q2Y, Start age: 25 | \$26,292.96 | Q2Y, Start age: 25 | \$32,583.09 |
| Stage II CRC continued care            | 0.988    | 0.912    | Q2Y, Start age: 25 | \$42,409.56 | Q2Y, Start age: 25 | \$19,723.92 |
| Stage III CRC continued care           | 0.7904   | 0.7296   | Q2Y, Start age: 25 | \$30,357.57 | Q2Y, Start age: 25 | \$28,271.09 |
| Stage IV CRC continued care            | 0.312    | 0.288    | Q2Y, Start age: 25 | \$29,300.54 | Q2Y, Start age: 25 | \$29,297.48 |
| Stage I CRC end-of-life care           | 0.312    | 0.288    | Q2Y, Start age: 25 | \$28,935.38 | Q2Y, Start age: 25 | \$29,644.34 |
| Stage II CRC end-of-life care          | 0.312    | 0.288    | Q2Y, Start age: 25 | \$29,819.62 | Q2Y, Start age: 25 | \$28,941.48 |
| Stage III CRC end-of-life care         | 0.312    | 0.288    | Q2Y, Start age: 25 | \$29,429.43 | Q2Y, Start age: 25 | \$29,078.12 |
| Stage IV CRC end-of-life care          | 0.312    | 0.288    | Q2Y, Start age: 25 | \$29,330.17 | Q2Y, Start age: 25 | \$29,134.03 |
| Colonoscopy (disutility)               | 0.00572  | 0.00528  | Q2Y, Start age: 25 | \$31,186.16 | Q2Y, Start age: 25 | \$27,507.1  |
| Colonoscopy complications (disutility) | 0.039936 | 0.036864 | Q2Y, Start age: 25 | \$29,309.64 | Q2Y, Start age: 25 | \$29,288.38 |
| <b>Probabilities</b>                   |          |          |                    |             |                    |             |

| Parameter                         | High Value | Low Value | High Optimal Strategy | High ICER    | Low Optimal Strategy | Low ICER     |
|-----------------------------------|------------|-----------|-----------------------|--------------|----------------------|--------------|
| Lifetime CRC risk <sup>a</sup>    |            |           | Q2Y, Start age: 25    | \$15,980.47  | Q2Y, Start age: 25   | \$48,099.65  |
| Adenoma Risk                      |            |           | Q2Y, Start age: 25    | \$23,219.43  | Q2Y, Start age: 25   | \$37,425.45  |
| Advanced Adenoma Risk             |            |           | Q2Y, Start age: 25    | \$27,080.59  | Q2Y, Start age: 25   | \$32,174.71  |
| Q1Y colonoscopy interval CRC rate | 0.22575    | 0.20425   | Q2Y, Start age: 25    | \$29,298.71  | Q2Y, Start age: 25   | \$29,298.71  |
| Q2 colonoscopy interval CRC rate  | 0.2877     | 0.2603    | Q3Y, Start age: 25    | \$132,535.46 | Q2Y, Start age: 25   | \$2,332.85   |
| Q3Y colonoscopy interval CRC rate | 0.3192     | 0.2888    | Q2Y, Start age: 25    | --           | Q3Y, Start age: 25   | \$115,467.61 |
| Q4Y colonoscopy interval CRC rate | 0.63       | 0.57      | Q2Y, Start age: 25    | \$29,298.71  | Q2Y, Start age: 25   | \$29,298.71  |
| Q5Y colonoscopy interval CRC rate | 0.87045    | 0.78755   | Q2Y, Start age: 25    | \$29,298.71  | Q2Y, Start age: 25   | \$29,298.71  |
| Colectomy death <60               | 0.000315   | 0.000285  | Q2Y, Start age: 25    | \$29,483.24  | Q2Y, Start age: 25   | \$29,115.16  |
| Colectomy death 60-70             | 0.00084    | 0.00076   | Q2Y, Start age: 25    | \$29,421.84  | Q2Y, Start age: 25   | \$29,176.02  |
| Colectomy death 70-80             | 0.00063    | 0.00057   | Q2Y, Start age: 25    | \$29,315.33  | Q2Y, Start age: 25   | \$29,282.09  |
| Stage 1 CRC death <sup>b</sup>    |            |           |                       |              |                      |              |
| Stage 2 CRC death                 | 0.01995    | 0.01805   | Q2Y, Start age: 25    | \$27,504.34  | Q2Y, Start age: 25   | \$31,215.48  |
| Stage 3 CRC death                 | 0.07245    | 0.06555   | Q2Y, Start age: 25    | \$28,673.57  | Q2Y, Start age: 25   | \$29,963.79  |

|                           |          |          |                    |             |                    |             |
|---------------------------|----------|----------|--------------------|-------------|--------------------|-------------|
| Stage 4 CRC death         | 0.96705  | 0.87495  | Q2Y, Start age: 25 | \$29,286.49 | Q2Y, Start age: 25 | \$29,312.16 |
| Colonoscopy complications | 0.000088 | 0.000072 | Q2Y, Start age: 25 | \$29,298.71 | Q2Y, Start age: 25 | \$29,298.71 |

ICER: incremental cost-effectiveness ratio, CRC: colorectal cancer.

<sup>a</sup>Lifetime CRC risk OWSA values can be found in eTable1

<sup>b</sup>Adenoma and advanced adenoma risk OWSA values can be found in References 9,10

<sup>c</sup>Stage 1 CRC death OWSA is represented in the colectomy death rows because Stage 1 CRC death was assumed to be from only colectomy death

Journal Pre-proof

Supplemental Figures

**eFigure 1. Modelled Natural History Cancer Death by Gene**

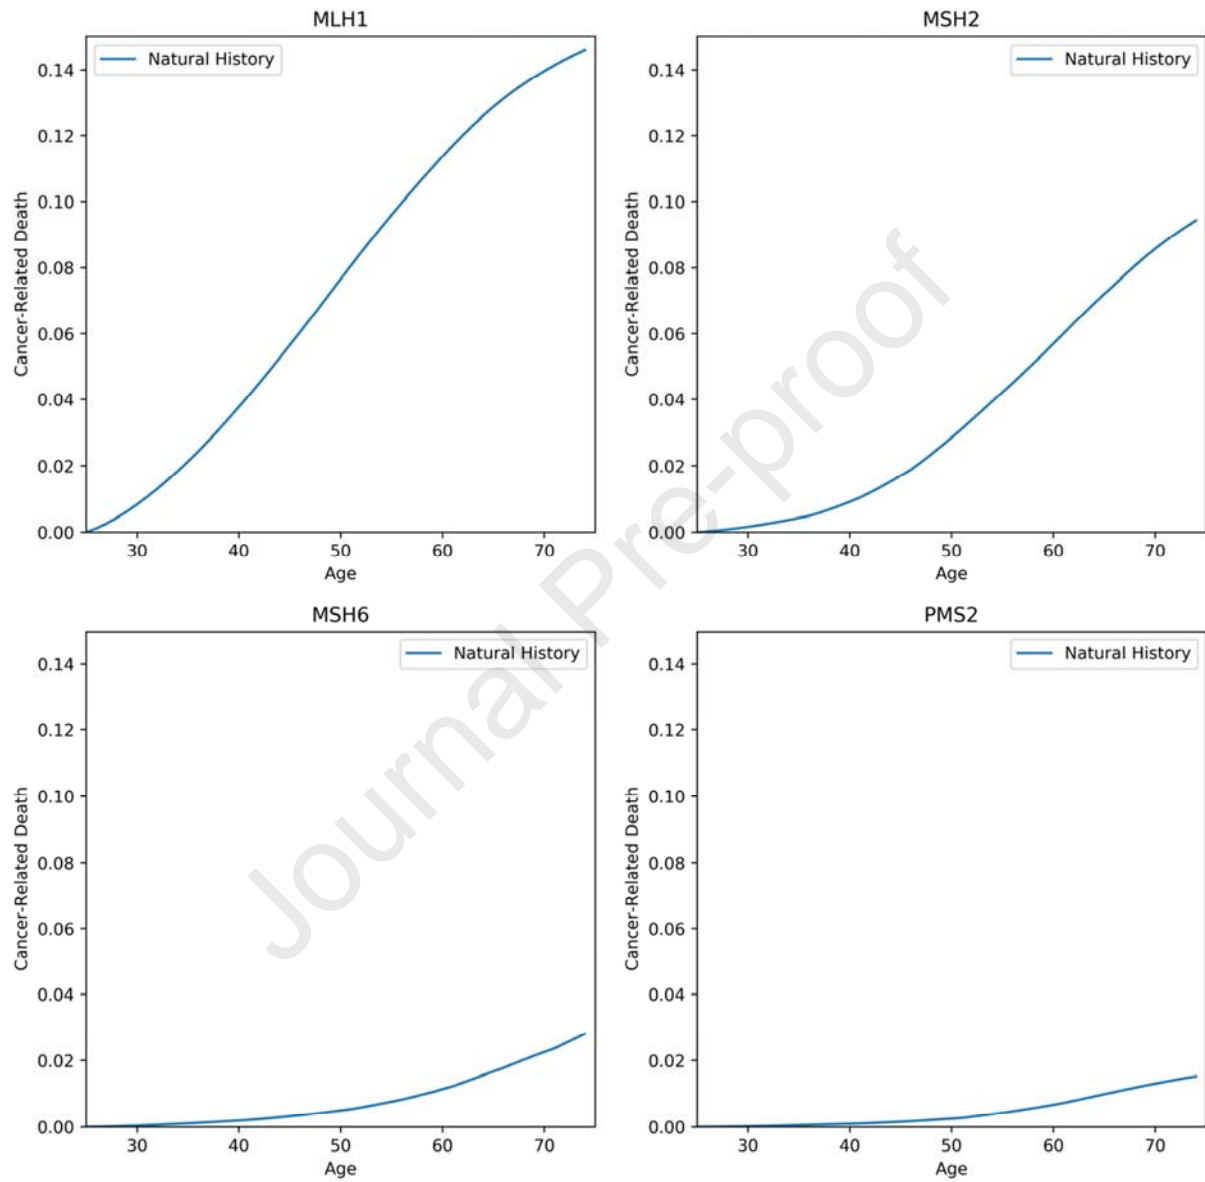

**eFigure 2. Modelled Natural History Cancer Incidence by Gene**

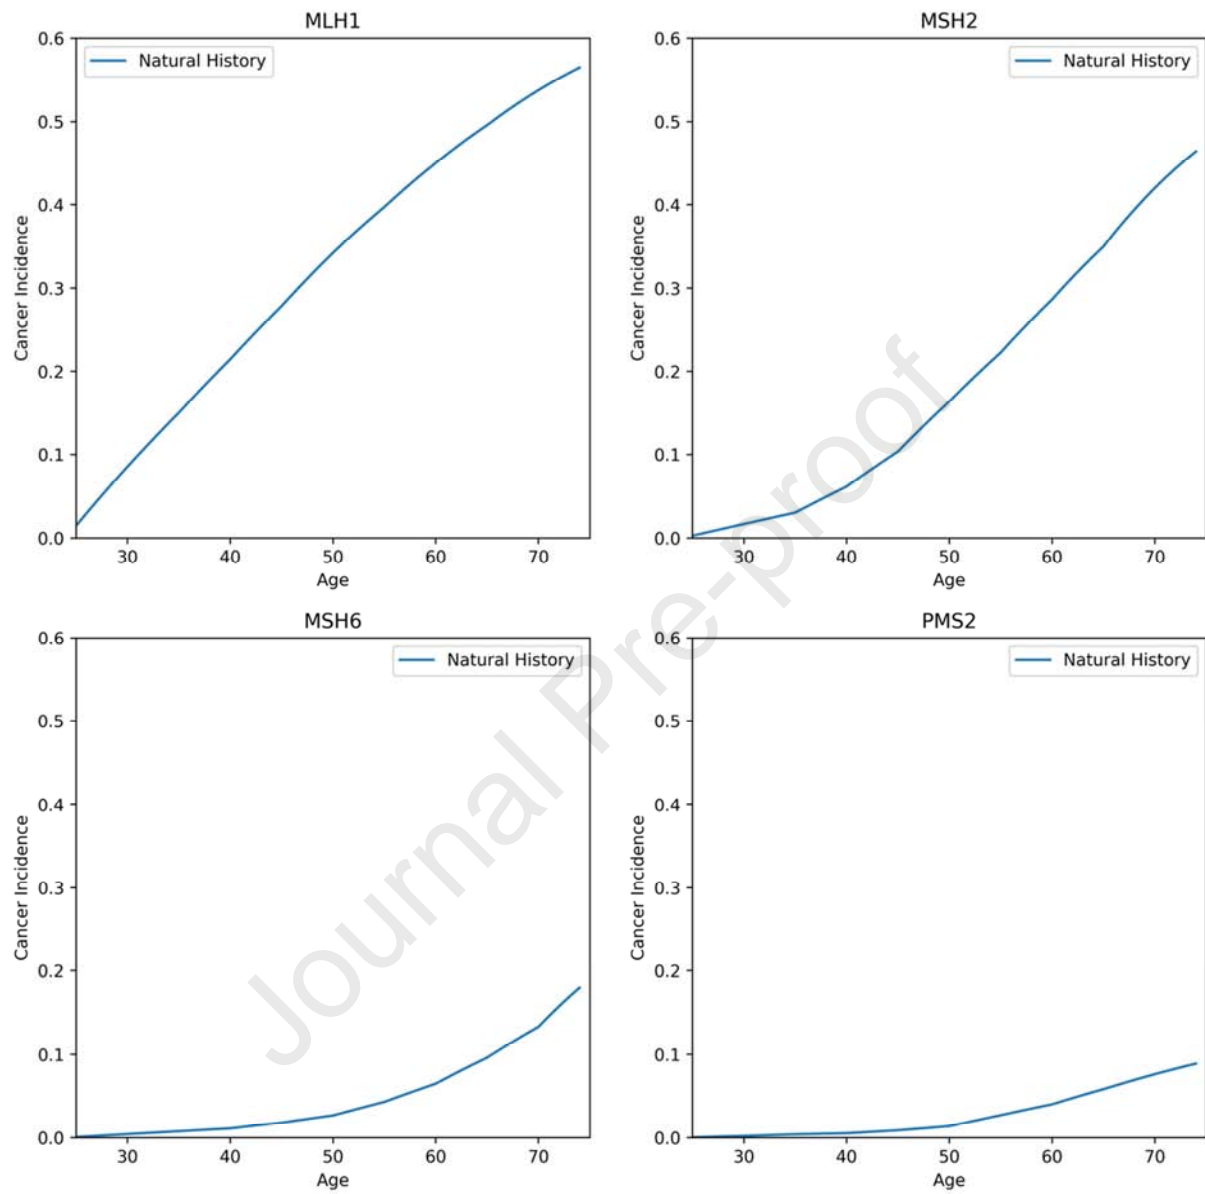

**eFigure 3. Colon Cancer Death for Strategies on the Efficiency Frontier, by Gene and Age.**

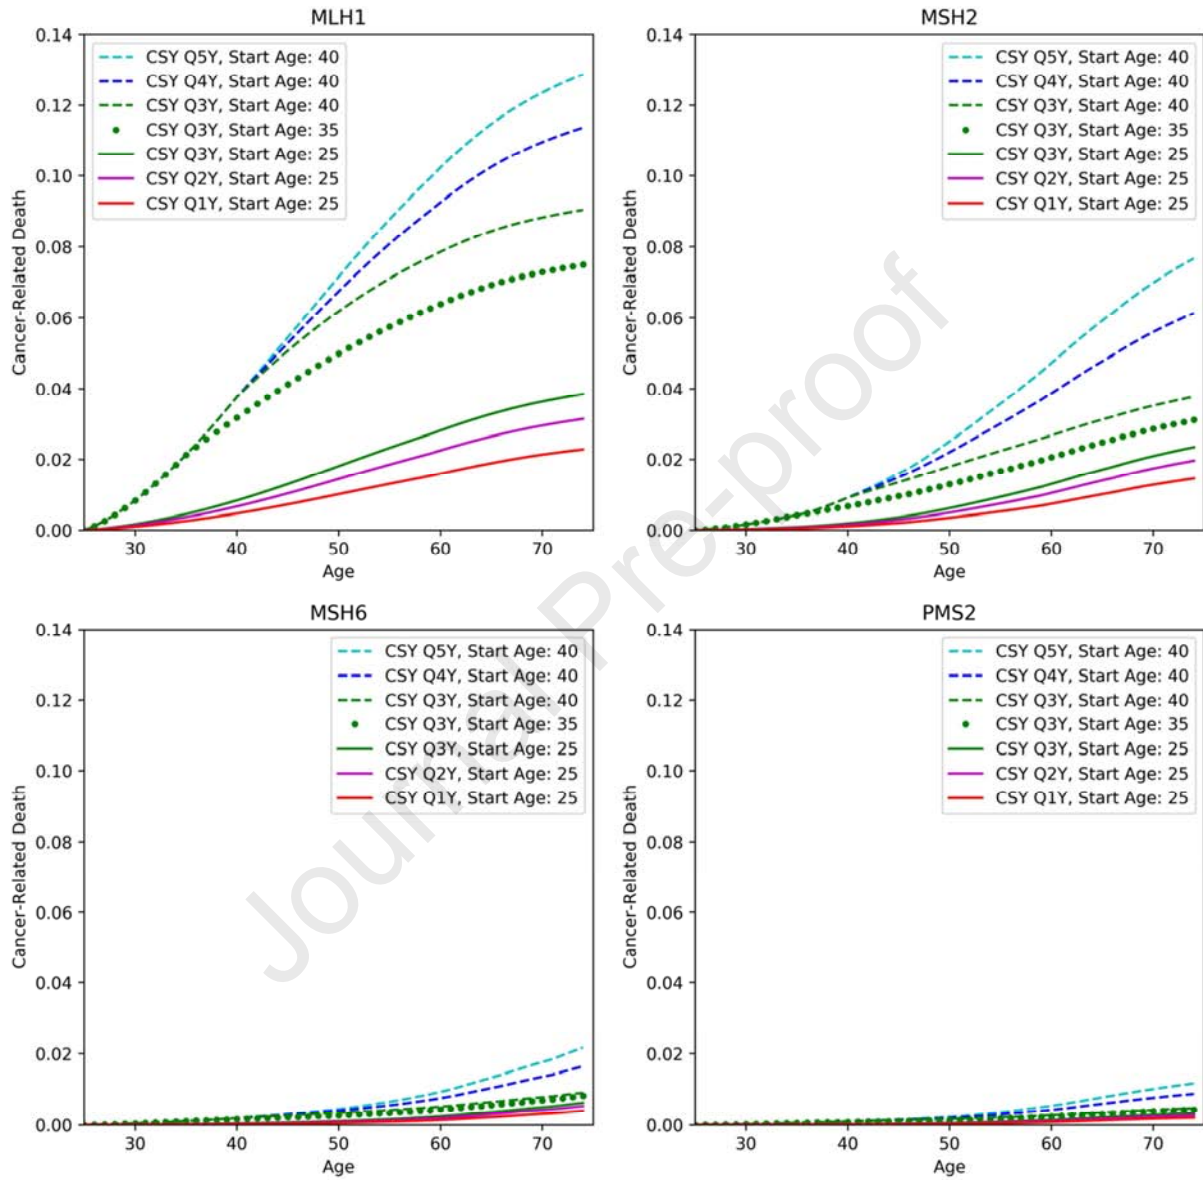

Strategies are represented as CSY (Colonoscopy) interval (years), starting age.

**eFigure 4. One-Way Sensitivity Analysis (OSWA) Results by Gene\***

**eFigure 4a. MLH1 OWSA Results**

**eFigure 4ai. MLH1 Q1Y, Start Age 25 Costs OWSA Results**

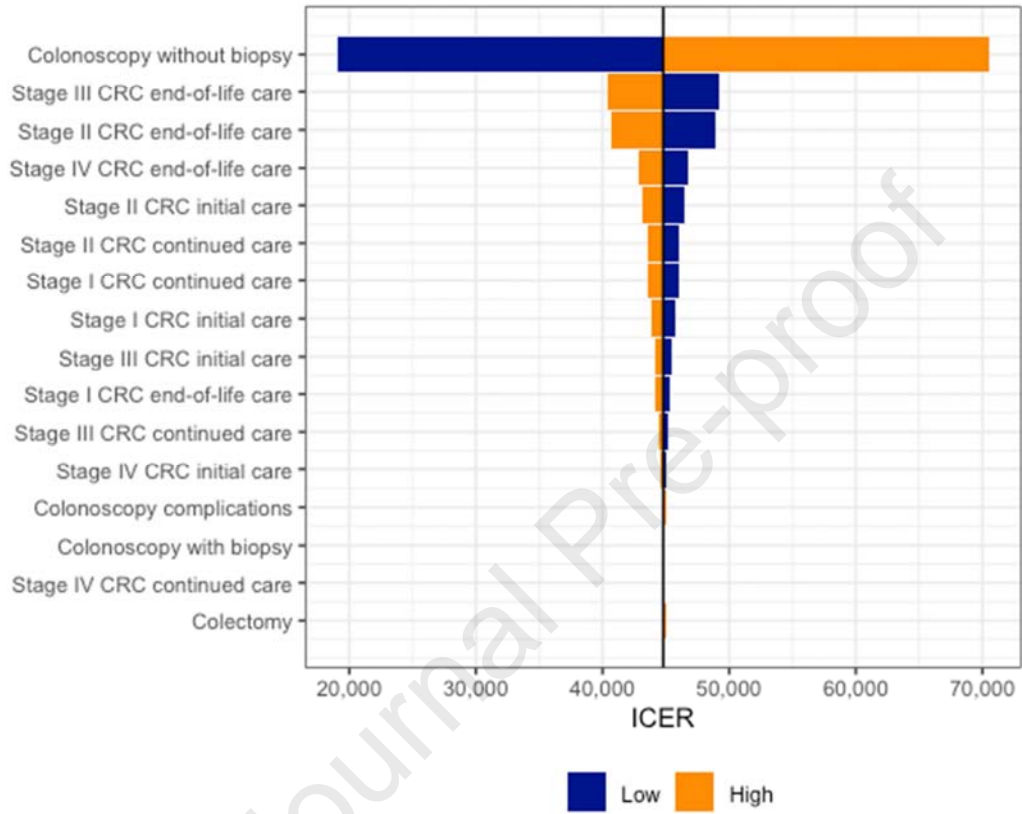

**eFigure 4aii. MLH1 Q1Y, Start Age 25 Utilities OWSA Results**

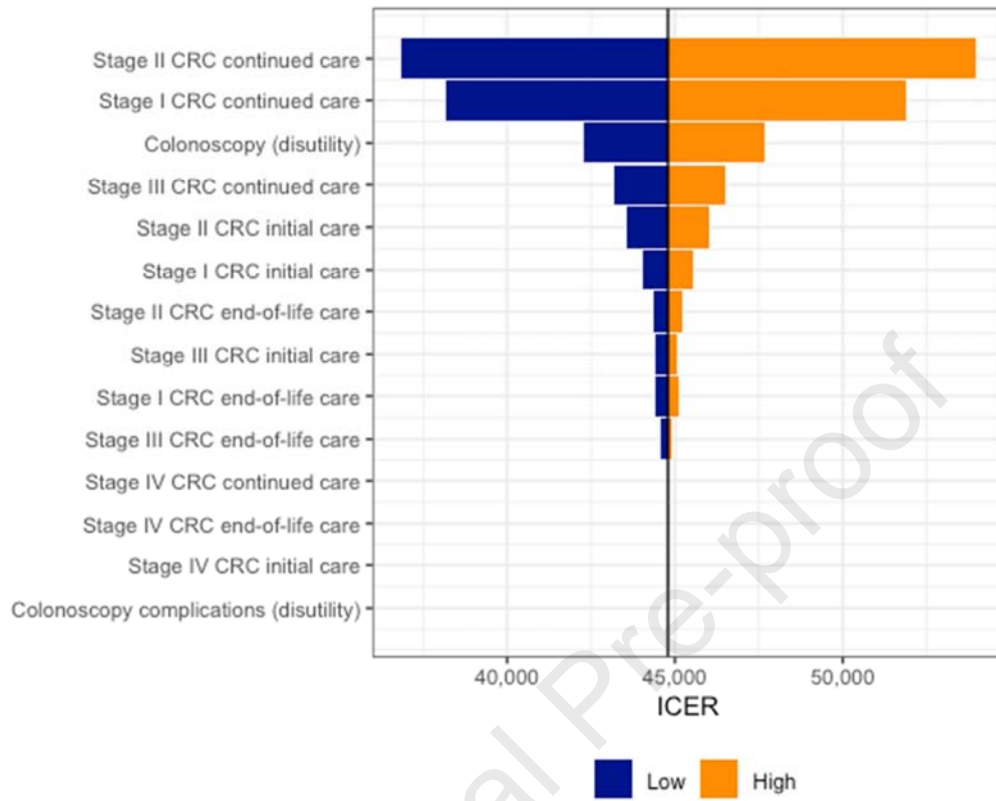



eFigure 4a. MLH1 Q1Y, Start Age 25 Probabilities OWSA Results

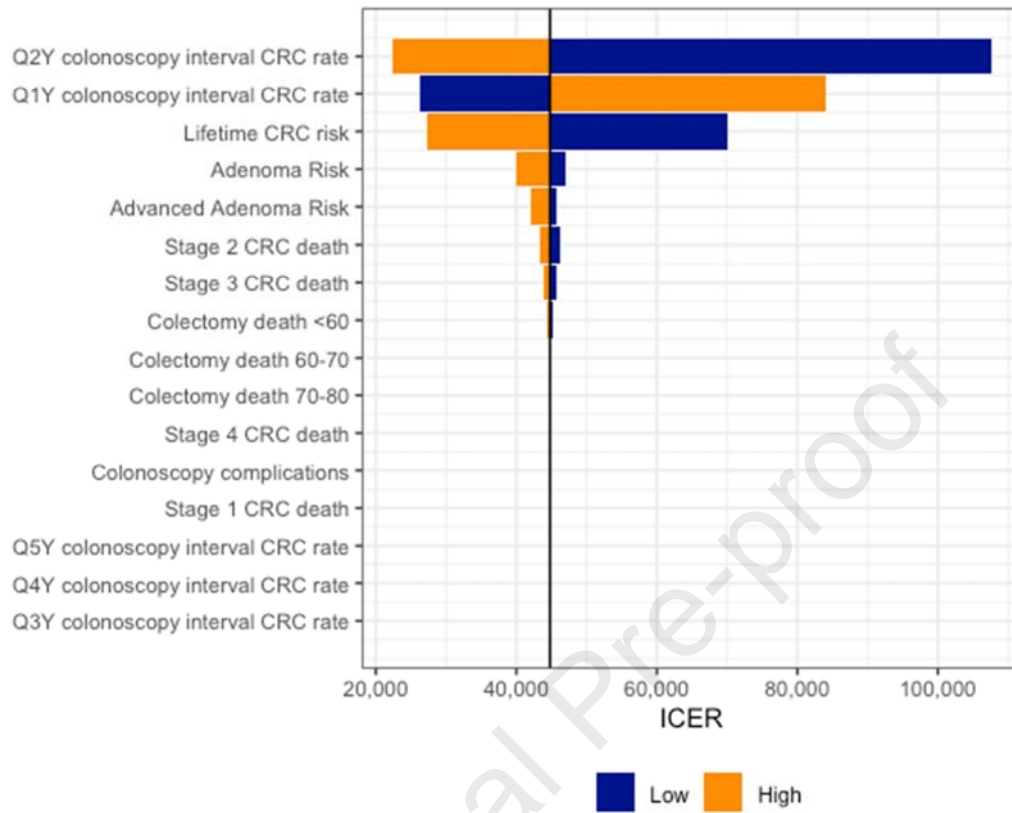

**eFigure 4b. MSH2 OWSA Results**

**eFigure 4bi. MSH2 Q2Y, Start Age 25 Costs OWSA Results**

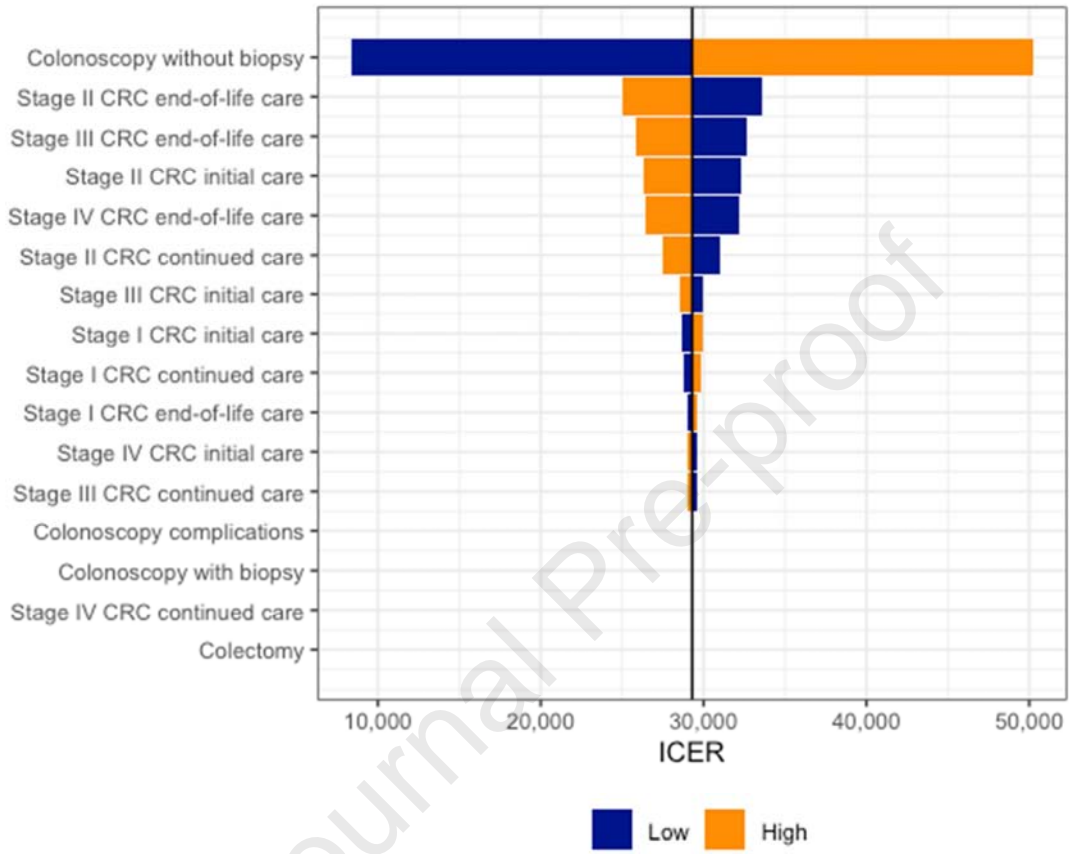

eFigure 4bii. MSH2 Q2Y, Start Age 25 Utilities OWSA Results

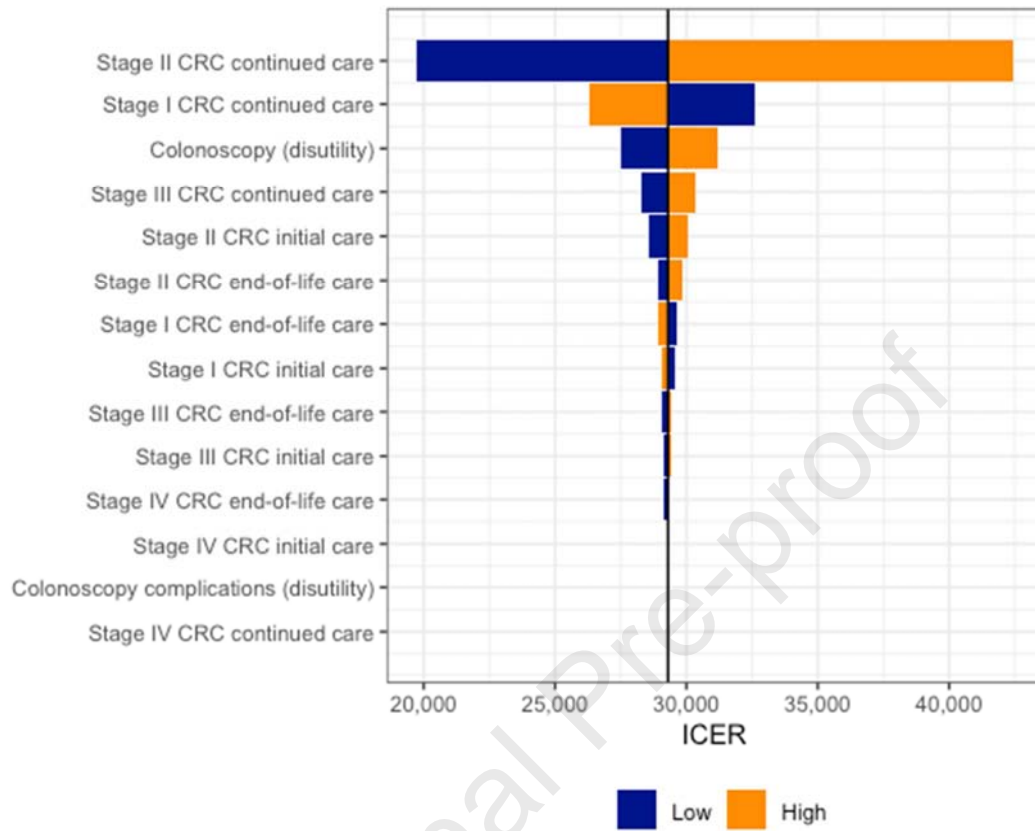

**eFigure 4biii. MSH2 Q2Y, Start Age 25 Probabilities OWSA Results**

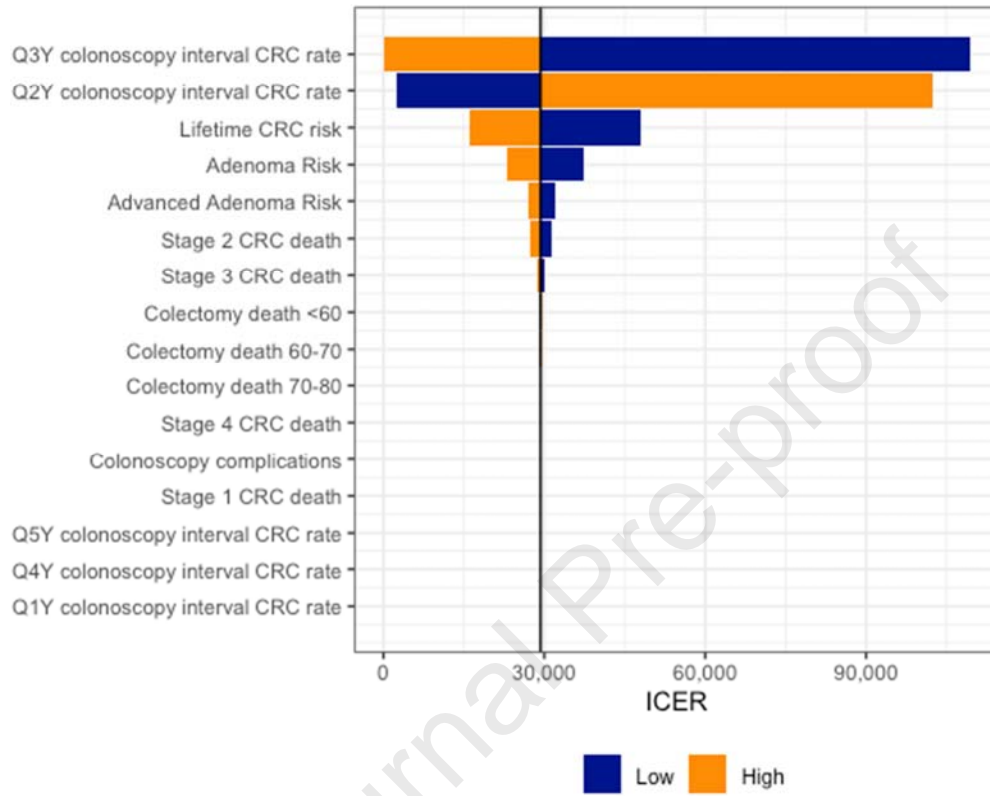

\*MSH6 and PMS2 was excluded because strategy remained the lowest cost-effective strategy in every run resulting in a blank ICER  
 \*Lifetime CRC risk could not be represented in the table vary based on age and gene in the model

**eFigure 5. Probabilistic Sensitivity Analysis (PSA) Results by Gene.**

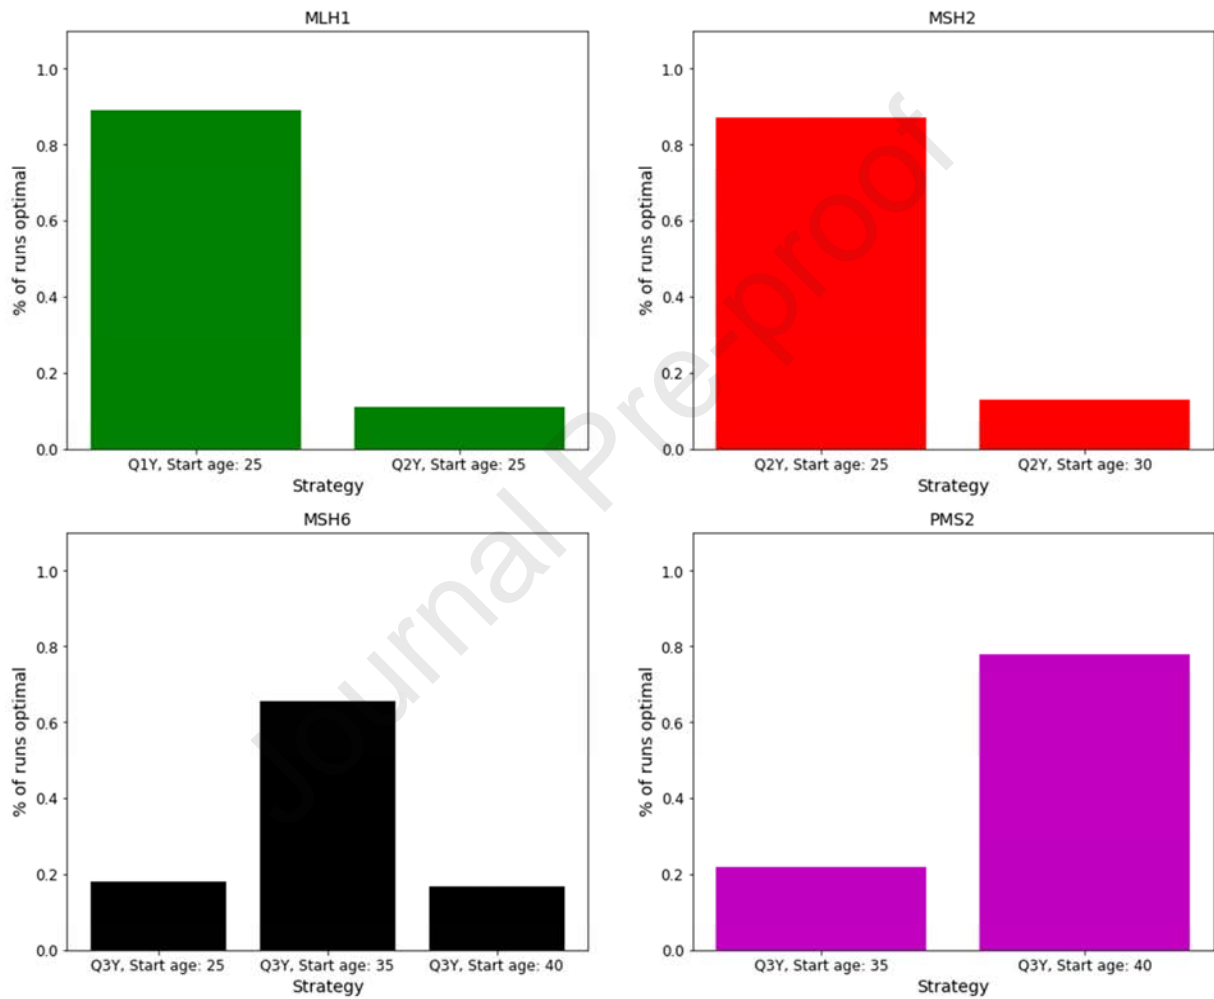

Results of 10,000 iterations of the PSA, which shows the percentage of trials in which the base case was the dominant strategy.

**eFigure 6a. Natural History CRC Incidence Compared to Perfect Intervention at age 30**

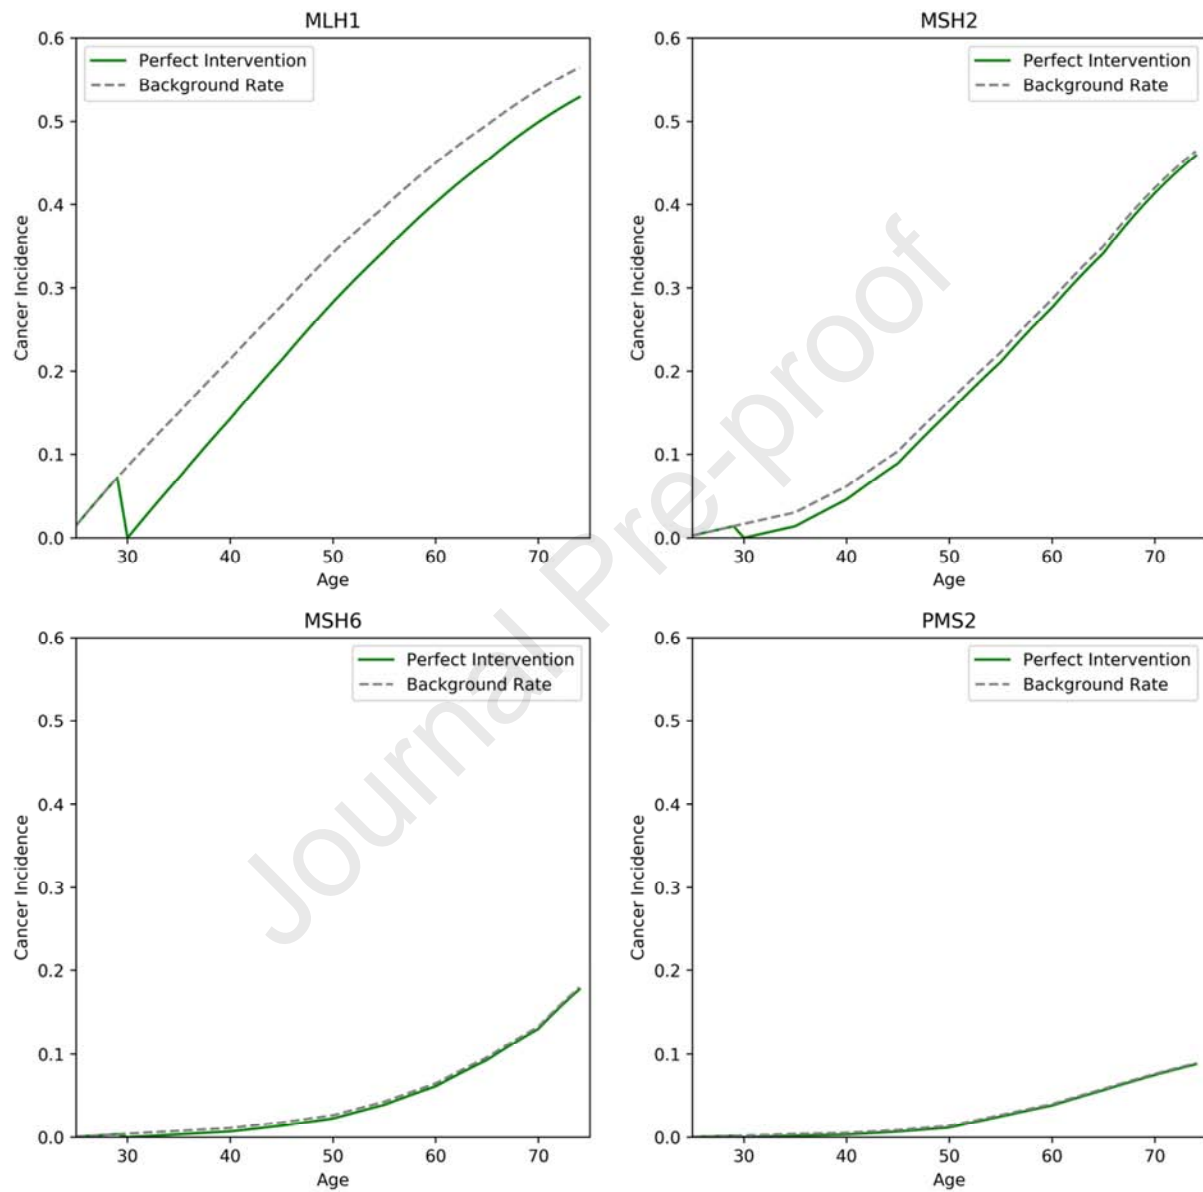

**eFigure 6b. Natural History CRC Incidence Compared to Perfect Intervention at age 35**

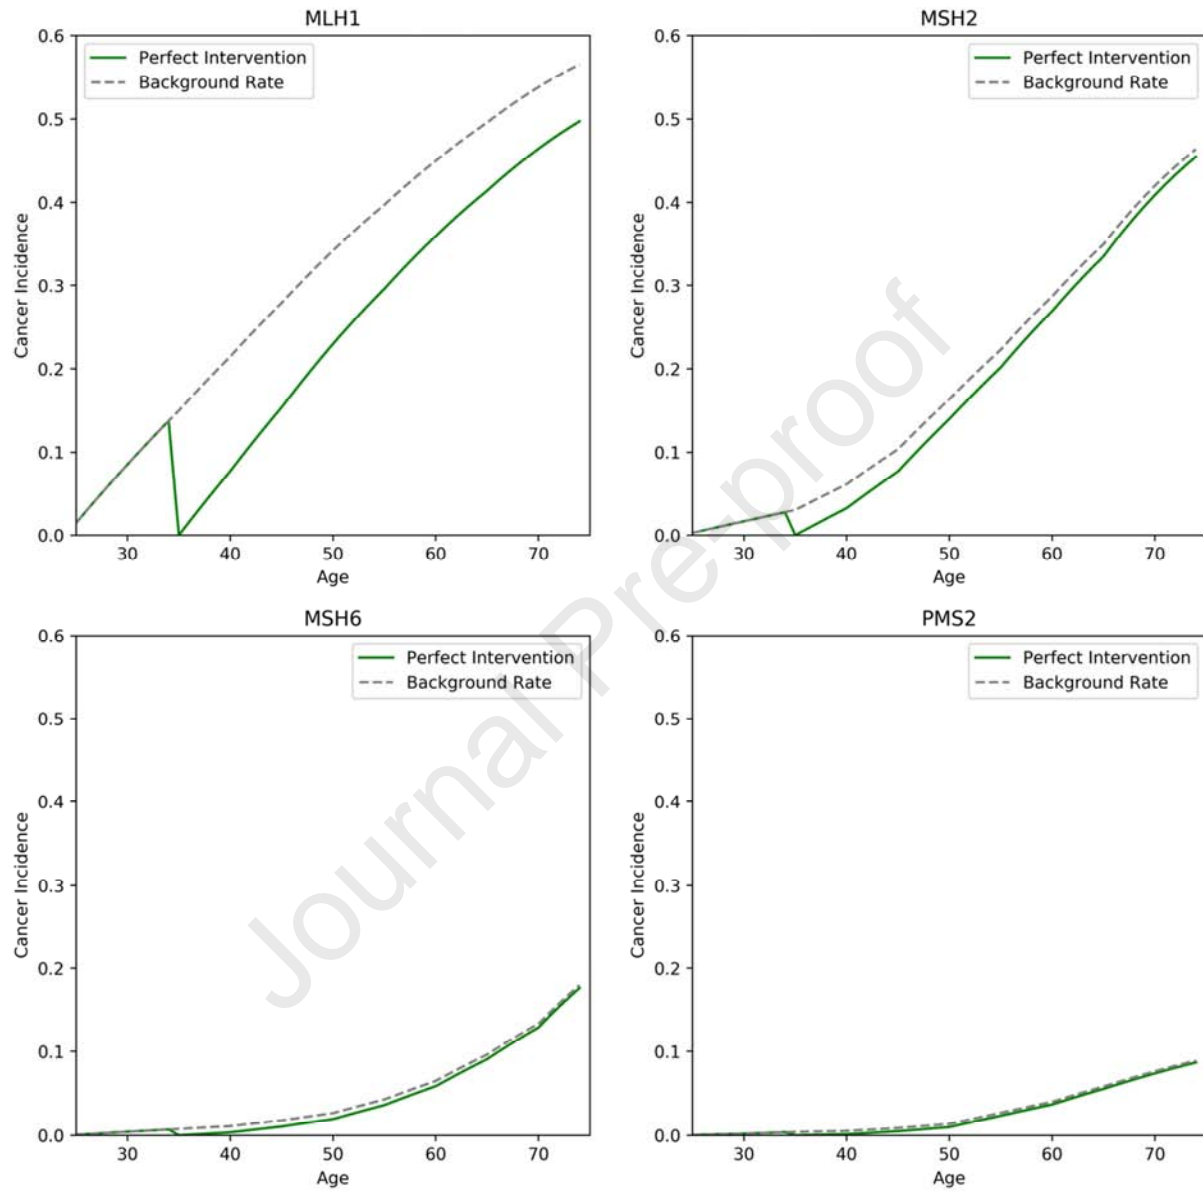

**eFigure 6c. Natural History CRC Incidence Compared to Perfect Intervention at age 40**

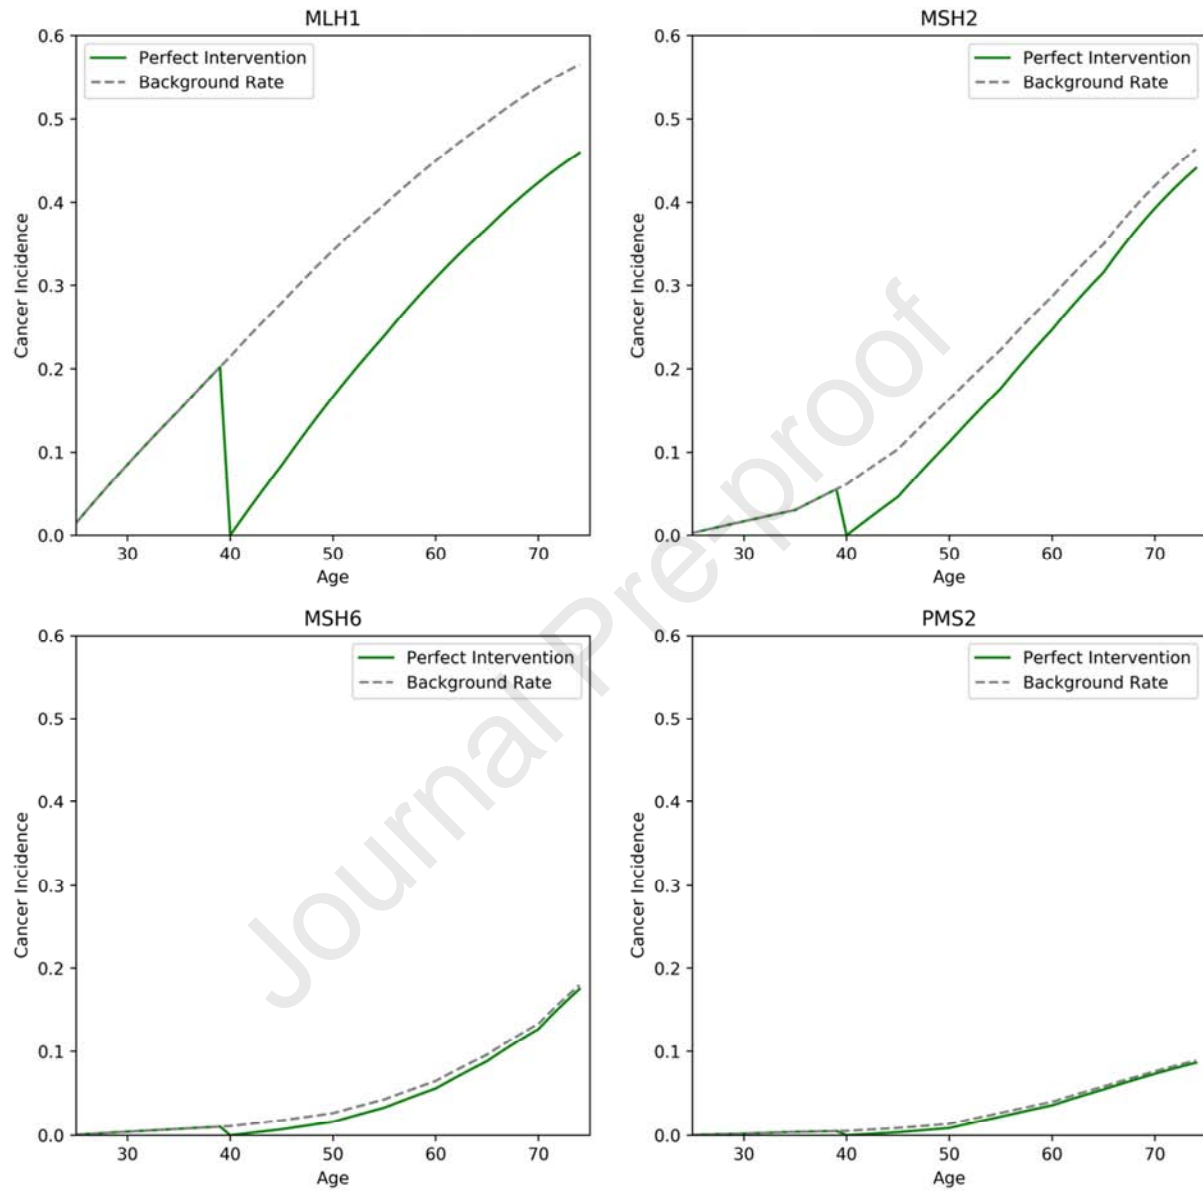



**eFigure 7a. Maximum Clinical Incidence Reduction (MCLIR): Age 30**

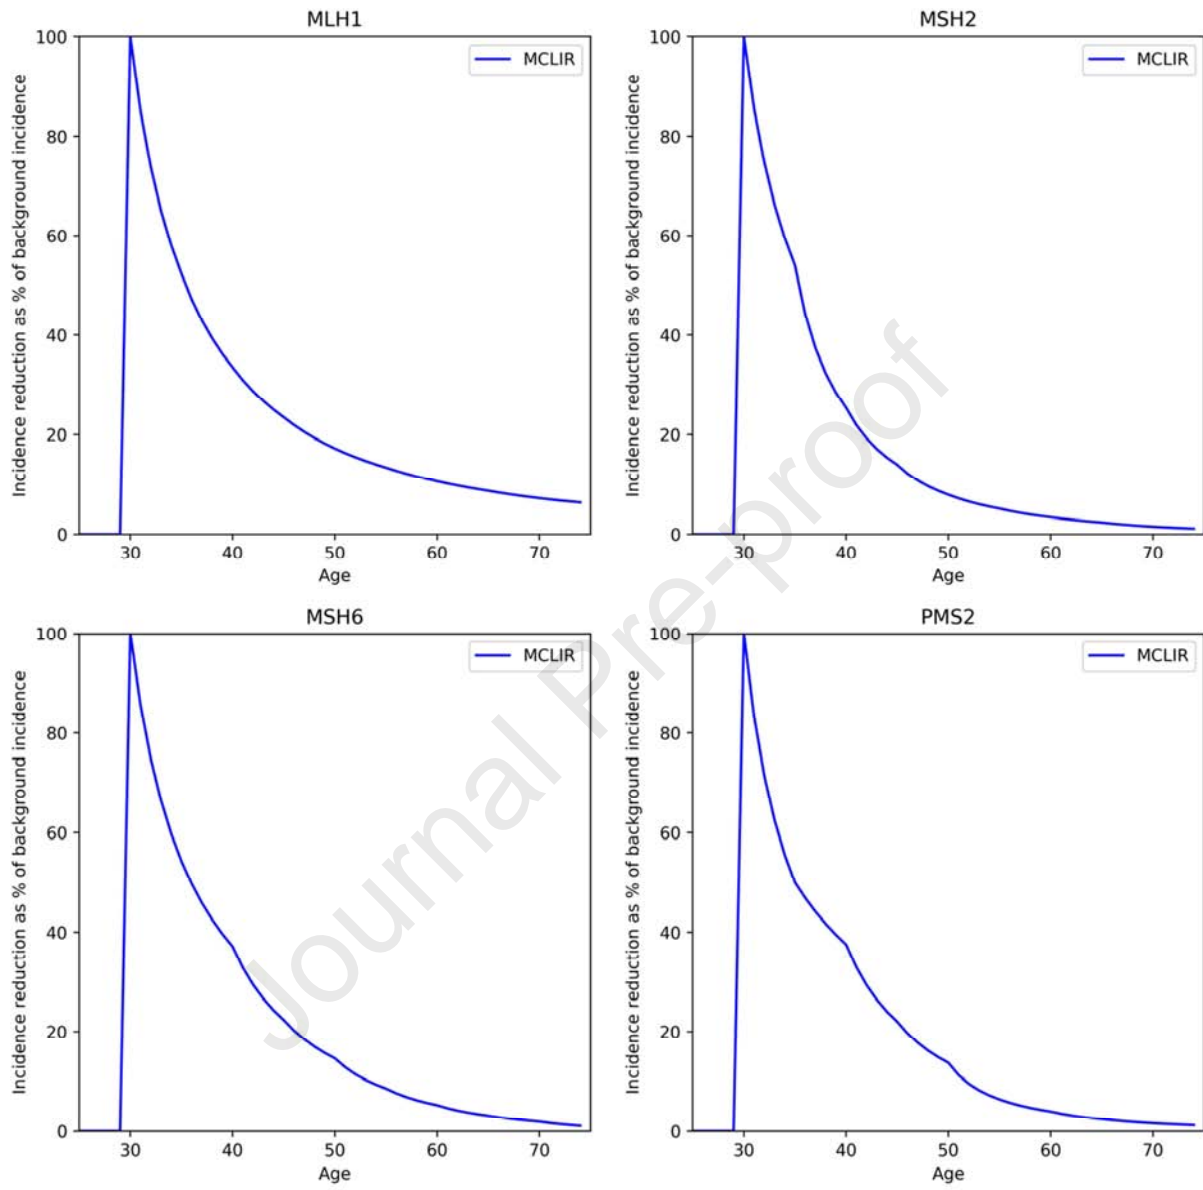

**eFigure 7b. Maximum Clinical Incidence Reduction (MCLIR): Age 35**

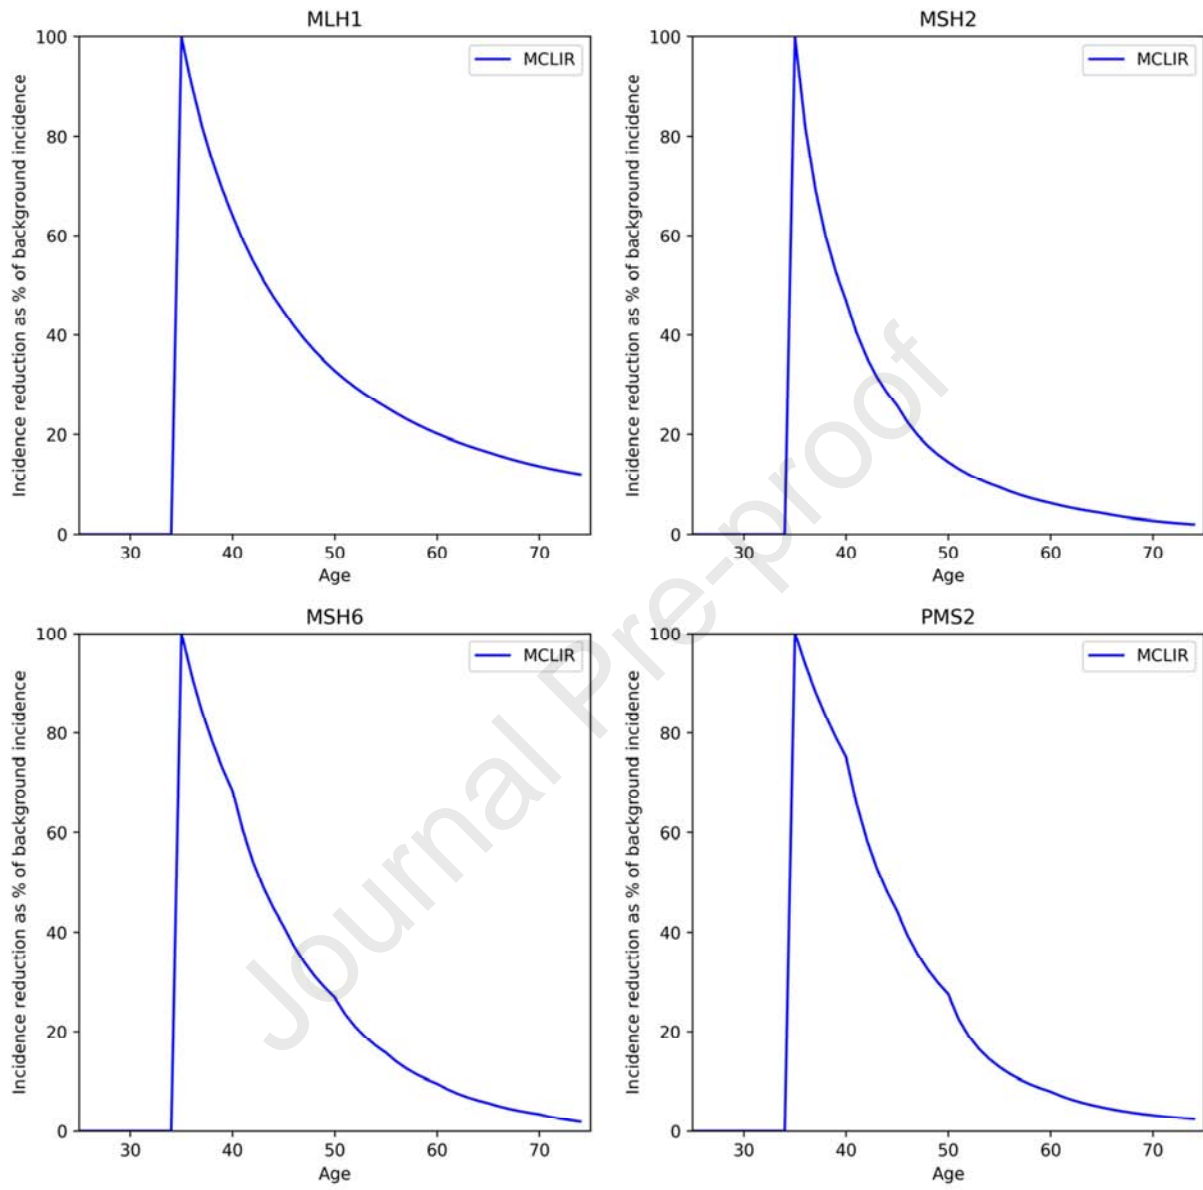

**eFigure 7c. Maximum Clinical Incidence Reduction (MCLIR): Age 40**

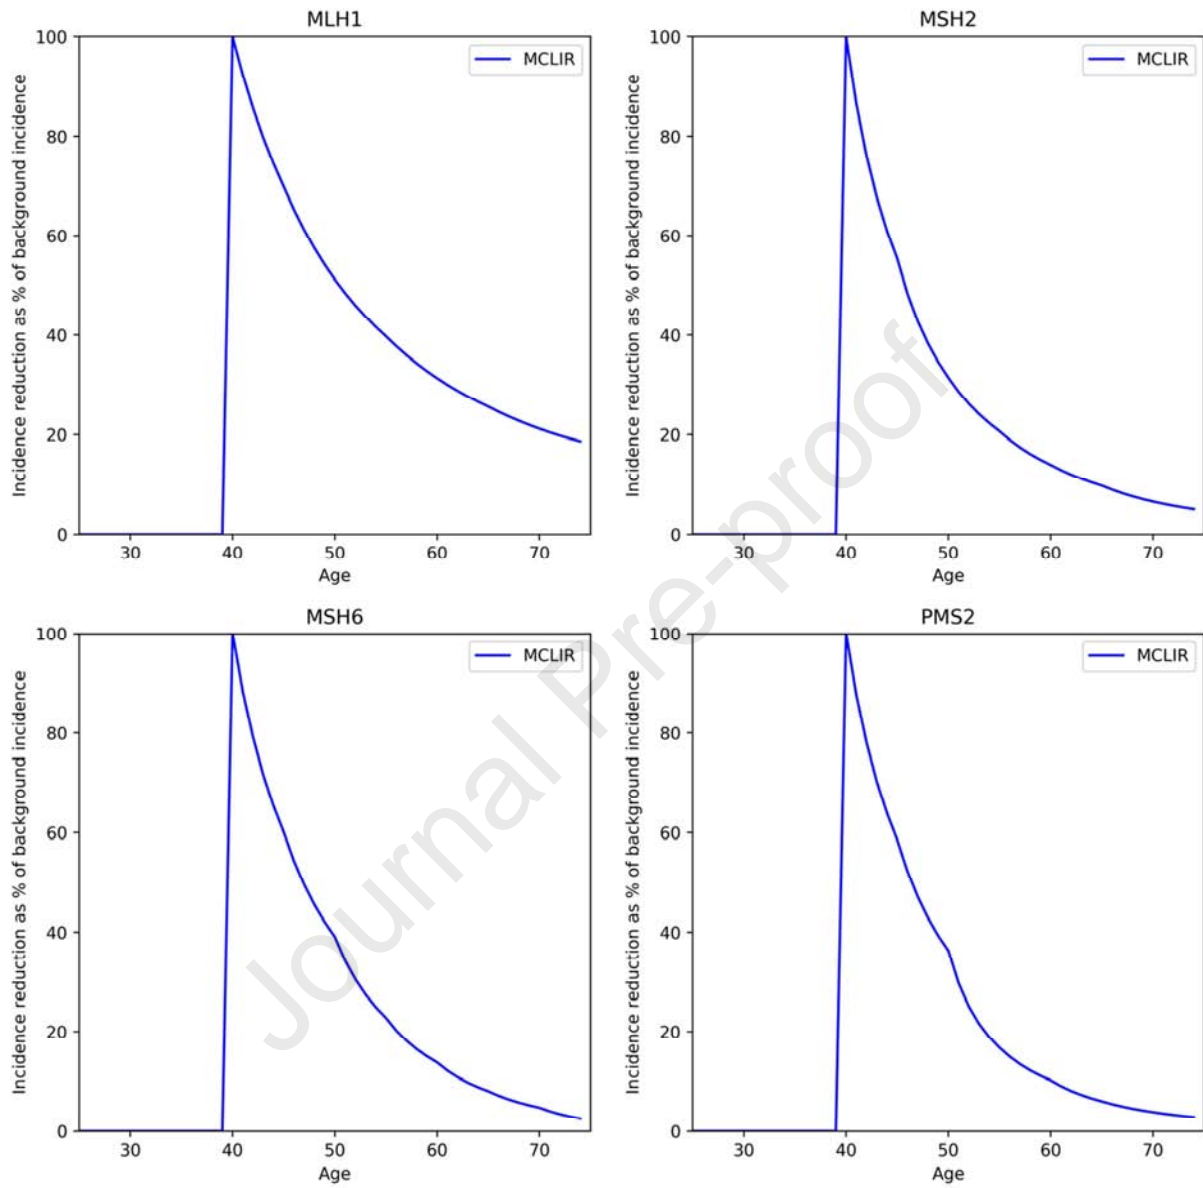

## References

1. Dominguez-Valentin M, Sampson JR, Seppälä TT, et al. Cancer risks by gene, age, and gender in 6350 carriers of pathogenic mismatch repair variants: findings from the Prospective Lynch Syndrome Database. *Genetics In Medicine*. 2020;22(1):15-25.
2. Stoffel E, Mukherjee B, Raymond VM, et al. Calculation of Risk of Colorectal and Endometrial Cancer Among Patients With Lynch Syndrome. *Gastroenterology*. 2009;137(5):1621-1627.
3. Baglietto L, Lindor NM, Dowty JG, et al. Risks of Lynch syndrome cancers for MSH6 mutation carriers. *J Natl Cancer Inst*. 2010;102(3):193-201.
4. ten Broeke SW, Brohet RM, Tops CM, et al. Lynch syndrome caused by germline PMS2 mutations: delineating the cancer risk. *J Clin Oncol*. 2015;33(4):319-325.
5. ten Broeke SW, van der Klift HM, Tops CMJ, et al. Cancer Risks for PMS2-Associated Lynch Syndrome. *J Clin Oncol*. 2018;36(29):2961-2968.
6. Mvundura M, Grosse SD, Hampel H, Palomaki GE. The cost-effectiveness of genetic testing strategies for Lynch syndrome among newly diagnosed patients with colorectal cancer. *Genetics In Medicine*. 2010;12:93.
7. Engel C, Vasen HF, Seppälä T, et al. No Difference in Colorectal Cancer Incidence or Stage at Detection by Colonoscopy Among 3 Countries With Different Lynch Syndrome Surveillance Policies. *Gastroenterology*. 2018;155(5):1400-1409.e1402.
8. Seppälä TT, Ahadova A, Dominguez-Valentin M, et al. Lack of association between screening interval and cancer stage in Lynch syndrome may be accounted for by over-diagnosis; a prospective Lynch syndrome database report. *Hered Cancer Clin Pract*. 2019;17.
9. Engel C, Ahadova A, Seppälä T, Aretz S. Associations of Pathogenic Variants in MLH1, MSH2, and MSH6 with Risk of Colorectal Adenomas and Tumors and With Somatic Mutations in Patients with Lynch Syndrome. *Gastroenterology* 2020;158(5):1326-1333.
10. Goverde A, Eikenboom E, Viskil E, Bruno M. Yield of Lynch Syndrome Surveillance for Patients With Pathogenic Variants in DNA Mismatch Repair Genes. *Clinical Gastroenterology and Hepatology*. 2020;18(5):1112-1120.
